# Supplementary material for: The State of Open Source Electronic Health Record Projects: A Software Anthropology Study
Source: JMIR Med Inform. 2017 Feb 24;5(1):e6. doi: 10.2196/medinform.5783 (PMC5346165; doi:10.2196/medinform.5783)
Supplement: Multimedia Appendix 1 [file medinform_v5i1e6_app1.pdf]

## Survey Questions

1. How many Healthcare F/OSS projects have you contributed to?

- ☐ 1
- ☐ 2-5
- ☐ 5-8
- ☐ More than 10

2. Why did you choose to participate in Health Care F/OSS project? (check whichever one is currently most applicable)

- ☐ It was an important and visible project
- ☐ It seemed technically interesting
- ☐ I knew people who were working on it
- ☐ The software being developed would be useful to me
- ☐ I launched the project
- ☐ The company (Healthcare organization) that I worked for uses the software
- ☐ Other please specify: Please enter an 'other' value for this selection.

3. Approximately what is the average number of hours per week you contributed to Health Care F/OSS project?

|                 |
|-----------------|
| less than 5     |
| 5-10            |
| 10-15           |
| 15-20           |
| 20-25           |
| greater than 30 |

4. What percentage of the code you've submitted has been included in the project's release version?

- ☐ Less than 25%
- ☐ 25-50%
- ☐ 50-75%
- ☐ 75-100%

5. How important were the following factors when you first started developing Healthcare F/OSS?

| 5. How important were the following factors when you first started developing Healthcare F/OSS?  | Very important        | Important             | A bit important       | Not important         |
|--------------------------------------------------------------------------------------------------|-----------------------|-----------------------|-----------------------|-----------------------|
| a) I thought it was the best way for software to be developed                                    | <input type="radio"/> | <input type="radio"/> | <input type="radio"/> | <input type="radio"/> |
| b) I thought we should all be free to modify the software we use                                 | <input type="radio"/> | <input type="radio"/> | <input type="radio"/> | <input type="radio"/> |
| c) I needed to perform tasks that could only be done with modified versions of existing software | <input type="radio"/> | <input type="radio"/> | <input type="radio"/> | <input type="radio"/> |
| d) I needed to fix bugs in existing software                                                     | <input type="radio"/> | <input type="radio"/> | <input type="radio"/> | <input type="radio"/> |
| e) As a user of free software, I wanted to give something back to the community                  | <input type="radio"/> | <input type="radio"/> | <input type="radio"/> | <input type="radio"/> |
| f) I wanted to help provide alternatives to proprietary software                                 | <input type="radio"/> | <input type="radio"/> | <input type="radio"/> | <input type="radio"/> |
| g) I wanted to interact with like-minded programmers                                             | <input type="radio"/> | <input type="radio"/> | <input type="radio"/> | <input type="radio"/> |
| h) I saw it as a way to become a better programmer                                               | <input type="radio"/> | <input type="radio"/> | <input type="radio"/> | <input type="radio"/> |
| i) I liked the challenge of fixing bugs and problems in existing software                        | <input type="radio"/> | <input type="radio"/> | <input type="radio"/> | <input type="radio"/> |
| j) I wanted to find out more about how a particular program worked                               | <input type="radio"/> | <input type="radio"/> | <input type="radio"/> | <input type="radio"/> |
| k) My employer wanted me to collaborate in open source development                               | <input type="radio"/> | <input type="radio"/> | <input type="radio"/> | <input type="radio"/> |

6. Approximately how many lines of code have you contributed?

- ☒ 500-5000
- ☐ 5000-10000
- ☐ More than 10000

7. Which of the following is the most appropriate description of your present occupational status?

|               |
|---------------|
| Student       |
| Employee      |
| Self-employed |
| Not employed  |

8. Which of the following statements are true for you? (check whichever one is currently most applicable)

- ☐ I am employed by healthcare organization and I get paid for my participation in F/OSS development
- ☐ My school/employer knows that I work on F/OSS
- ☐ My school/employer has assigned me to work on F/OSS on the job
- ☐ My school/employer is unaware of my involvement in F/OSS
- ☐ My school/employer does not want me to collaborate in F/OSS development
- ☐ I do not currently have an employer

9. Do you earn money from Healthcare F/OSS, either directly or indirectly? (check whichever one is currently most applicable)

- ☐ No
- ☐ Yes, directly: I am paid for developing F/OSS
- ☐ Yes, directly: I am paid for supporting F/OSS
- ☐ Yes, directly: I am paid for managing F/OSS
- ☐ Yes, indirectly: I got my job because of my previous F/OSS experience
- ☐ Yes, indirectly: My job description does not include F/OSS development
- ☐ Yes, indirectly: But I also develop F/OSS in my work
- ☐ Yes,  other reasons - Please specify: Please enter an 'other' value for this selection.

10. When do you work on open source/free software projects? (check whichever one is currently most applicable)

- ☐ Before I go to work
- ☐ At work, during work hours
- ☐ Off work hours
- ☐ On weekends

- ☐ I'm not employed right now, so whenever I want

11. What is your gender?

Male  
Female

12. What is your marital status/domestic situation? (check whichever one is currently most applicable)

- ☐ Unmarried, without partner
- ☐ Unmarried, not living with partner
- ☐ Unmarried, living with partner
- ☐ Married, not living with spouse
- ☐ Married, living with spouse
- ☐ Separated/Divorced

13. What is your highest formal education level?

High school  
Undergraduate  
Graduate (Master's or Doctoral)  
Professional (JD, MBA, etc.)

14. Have you ever worked in the healthcare ?

Yes  
No

15. Are you a healthcare practitioner (physician, nurse, pharmacist ...etc.)?

- ☐ Yes
- ☐ No

☐ If yes, please specify Please enter an 'other' value for this selection.

16. What is your nationality?

17. What country do you live in?

18. Which one of these free/ open source software have you contributed to?

- ☐ OpenEMR
- ☐ OpenMRS

- ☐ Care2X
- ☐ Open Clinic Ga
- ☐ FreeMED
- ☐ Open Hospital
- ☐ GNU health
- ☐ HOSxP
- ☐ Hospital Management System
- ☐ Tolven Health Record
- ☐ CottageMed EHR
- ☐ WorldVista EHR
- ☐ OpenPatientOS
- ☐ e-Svaasthya
- ☐ OSCAR McMaster

19. Do you have children?

- ☐ No
- ☐ Yes, younger than age 6
- ☐ Yes, older than age 6

20. Which age range do you fall into?

- ☐ less than 25
- ☐ 25-35
- ☐ 35-45
- ☐ 45-55
- ☐ 55-65
- ☐ 65-75
- ☐ more than 75
